# Supplementary material
Source: publisher figshare collection journal article supplement (https://sage.figshare.com/ndownloader/files/22798958)
Supplement: Supplementary file 1 [file 22798958]

**Appendix 1: Programme end interview schedule**

Thank you for taking part in GROW and agreeing to this interview. As part of the evaluation of the programme I have a few questions I would like to ask you. I hope it’s okay if I record your answers (show audio recorder) as it will save me writing everything down. Your interview is confidential and if you mention any names, I will erase/change these so that the people are anonymous. Once I have transcribed the interview, I will erase the recording.

*If answers very brief try to probe for longer answers.*

**1. Joining the programme:**

- How did you find out about the programme?
- Why did you want to take part in this project? (what did you hope to get out of it)
- Did you take part in any activities with the art gallery before the project?
- What did you feel about the art gallery before this project?
- Were you always interested in gardening or what it something new for you?

**2. Activities**

- What were the highlights of the project for you/what really stood out for you? *Can you say a bit more about what was good about this part of the project?*
- What was personally meaningful (in the project) for you?
- Can you tell me a bit about what you have learnt?
- How did you feel about working in the spaces of the gallery? *What was different?*
- How did you feel about working in the spaces outside of the gallery?
- What was most satisfying about creating the garden?
- What parts of the project didn’t you like?
- What would have made it better for you? (*probes: access, time, length of session, other support, content of session, facilitation)*

The next few questions are about your health and wellbeing and the impact of the museum project. If there is anything you don’t want to answer then you don’t have to.

**3. Health, wellbeing and feelings**

- Can you think back to before the project: What was your overall health and wellbeing like before starting the project?
- What was your health and wellbeing like while taking part in the project? *Why do you think that?*
- How do you think this short programme has made a difference to your health and your wellbeing?
- How did this happen? (Prompts: gradually, all at once)
- Would you mind telling me about any emotions you experienced during the project?
- What do you think triggered these emotions? (positive or negative?)
- What did you discover about yourself during the project?
- Do you think projects like this can help with recovery? (why is that important?) How has it helped you?
- If you hadn’t been coming to this project, what do you think would have happened to your health and wellbeing? *Why do you think that?*

**4. Working with others/socialising**

The museum project was a group activity:

- How did you feel being in the group?
- Did this change over time? (*did you get on with people better/worse/the same)*
- Did you get on with people? Did the activites help you to feel more connected with other people in the group? (*how did this happen?*)
- Did you feel supported by the other people in the group?
- Did being in this group feel different to other groups you have been a part of? *(Can you tell me why?)*
- Did you feel supported by the worker? How?

**5. Future projects:**

- Would you like take part in a similar activity in the future?
- What suggestions would you like to make about project we run in the future?
- Would you like to become an Art Gardener volunteer?

**6. Final questions and feedback:**

- Is there anything I haven’t covered that was important to you about the project
- Is there anything else you would like to add?
